# Supplementary material for: The effect of chitosan molecular weight on CO2-triggered switching between emulsification and demulsification
Source: Royal Society of Chemistry journal article supplement (doi:10.1039/d1sm01036k), 2021-01-01
Supplement: d1sm01036k1.pdf [file d1sm01036k1.pdf]

# SUPPORTING INFORMATION

## Effect of Chitosan Molecular Weight on CO<sub>2</sub>-Triggered Switching between Emulsification and Demulsification

Dongyin Ren<sup>1</sup>, Zhixin Shang<sup>1</sup>, Mei Zhang<sup>1</sup> and Zhenghe Xu<sup>2,3</sup>

<sup>a</sup> College of Textile and Clothing, Dezhou University, Dezhou, 253023, P. R. China

<sup>b</sup> Institute of Nuclear and New Energy Technology, Tsinghua University, Beijing 100084, P. R. China

<sup>c</sup> Department of Materials Science and Engineering, Southern University of Science and Technology, Shenzhen 518055, China

Tab. S1. Molecular weight of 4 chitosan samples.

| Sample                   | Mn(g/mol) | Mw(g/mol) | PD   |
|--------------------------|-----------|-----------|------|
| 3×10 <sup>3</sup> Da CTS | 3127      | 3280      | 1.05 |
| 2×10 <sup>4</sup> Da CTS | 19540     | 20910     | 1.07 |
| 5×10 <sup>4</sup> Da CTS | 51008     | 54541     | 1.07 |
| 2×10 <sup>5</sup> Da CTS | 190330    | 218000    | 1.15 |

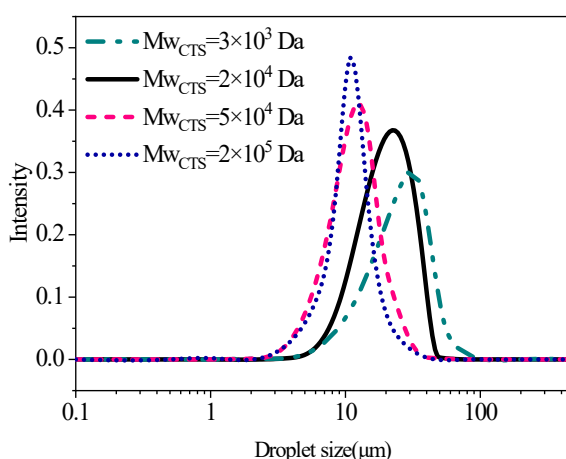

Fig.S1. Droplet distribution curves of emulsions stabilized by chitosan products with different molecular weight.

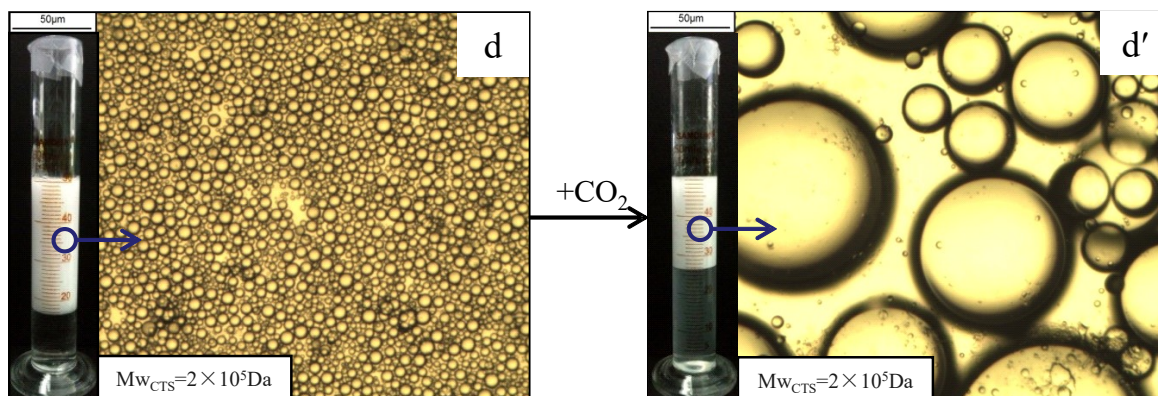

Fig.S2. Optical micrographs of the emulsions stabilized by CTS sample with molecular weight of 2×10<sup>5</sup> Da.

Insets are digital photographs of the corresponding emulsions.

Mw= $5 \times 10^4$ Da   Mw= $2 \times 10^5$ Da

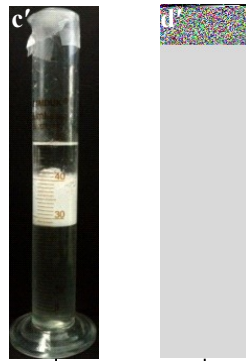

25°C +CO<sub>2</sub>, 2h

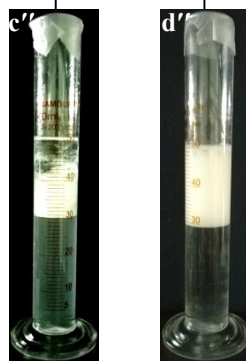

15

16 **Fig.S3.** CO<sub>2</sub>-switched demulsification of the emulsions formed by CTS with the molecular weight of  $5 \times 10^4$  Da  
 17 and  $2 \times 10^5$  Da after an extra 2 hours of bubbling CO<sub>2</sub>.

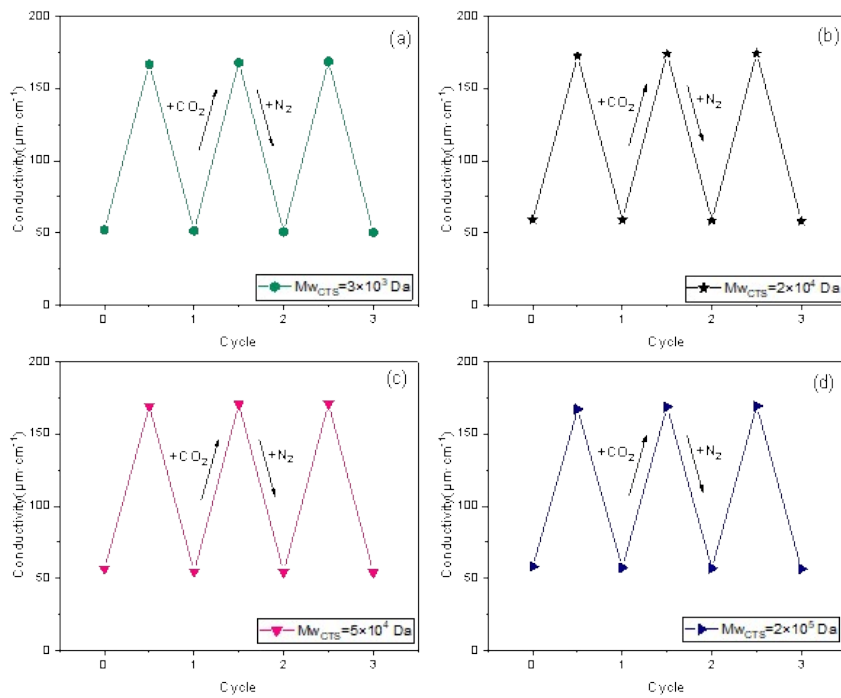

18

19 **Fig.S4.** Conductivities during repeated cycles of CTS samples with different molecular weight under CO<sub>2</sub>/N<sub>2</sub>.

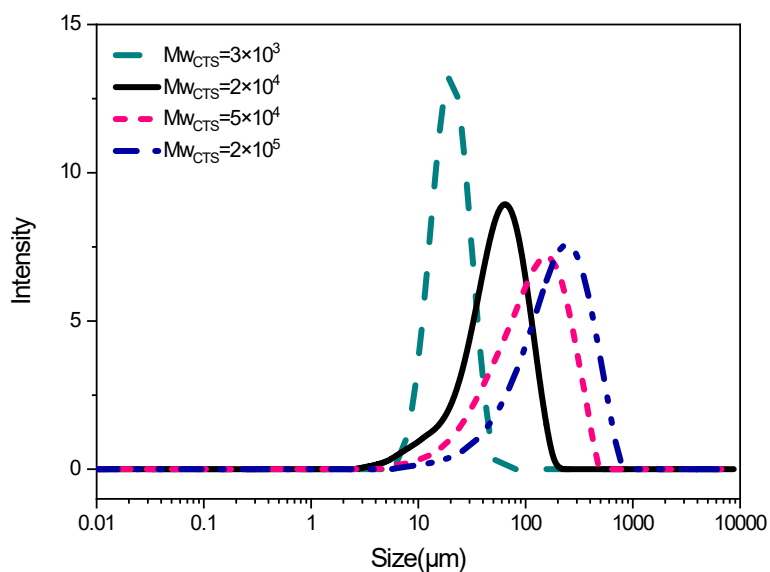

20  
21

Fig. S5. Size distribution of chitosan with different molecular weights.

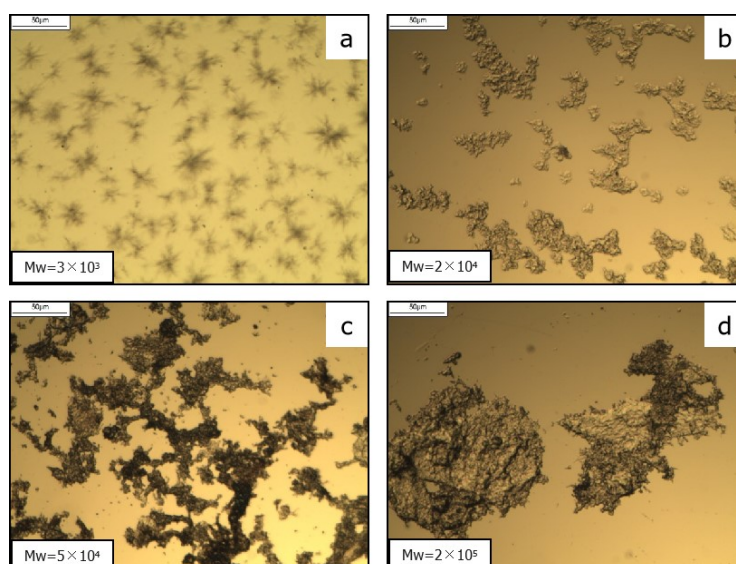

22  
23

Fig. S6. Optical micrographs of CTS samples with different molecular weight.

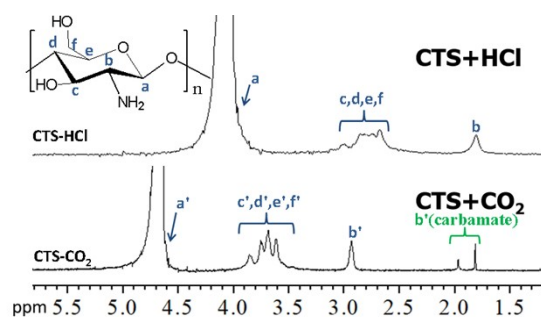

24

Figure S7. The  $^1\text{H}$ NMR of CTS-HCl (upper) and CTS- $\text{CO}_2$  (lower)

25

26

27

The measurements of  $^1\text{H}$  NMR illustrate that the products in the stimulation of HCl and  $\text{CO}_2$  are different. As shown in **Fig.S7**, compare with the  $^1\text{H}$  NMR spectrum of CTS-HCl, all the H

28 peaks shift to lower fields in the  $^1\text{H}$  NMR spectrum of CTS- $\text{CO}_2$ ; meanwhile, new peaks at 1.80  
29 ppm and 1.95 ppm appears in the  $^1\text{H}$  NMR spectrum of CTS- $\text{CO}_2$  which belongs to the -  
30  $\text{NHC}(\text{O})\text{OH}$  protons, represents clear evidence for CTS-carbamates formation.<sup>1</sup>  
31

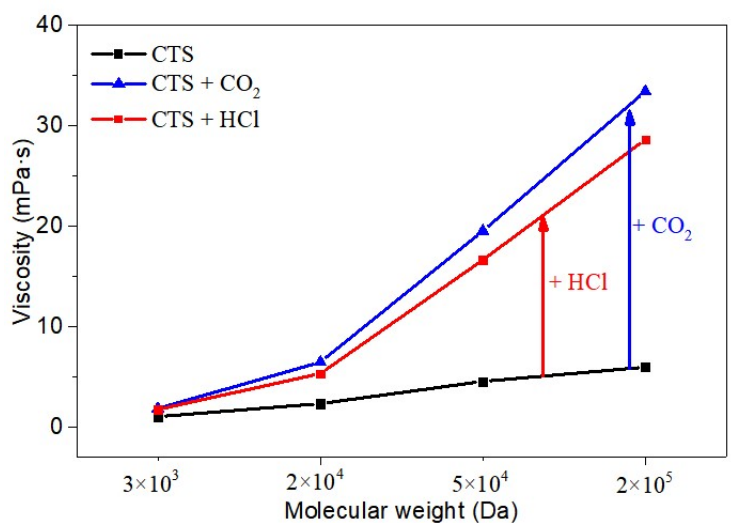

32

33 Fig.S8. The viscosity of CTS samples with different molecular weight treated by bubbling  $\text{CO}_2$  and adding  
34 hydrochloric acid solution (0.01M).  
35

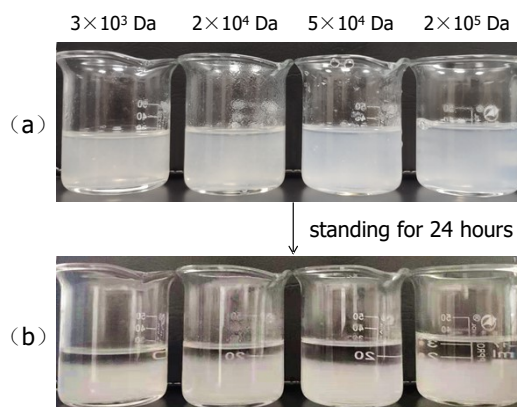

37 Fig. R1 Photographs of CTS aqueous solutions freshly prepared (a) and after standing for 24 h (b), with molecular  
38 weight of CTS being given on top.  
39

40 **Fig. R1 (b)** shows the precipitates of CTS at the bottom of the beakers after 24-h standing of the  
41 solution, in contrast to milky dispersion of CTS aggregates in the freshly prepared aqueous  
42 solutions as shown in **Fig. R1 (a)**.  
43

44 1. V. Stastny, A. Anderson and D. M. Rudkevich, *Journal Of Organic Chemistry*, 2006, **71**, 8696-8705.  
45
